# Supplementary material for: Isolation, Identification, and Genomic Analysis of a Novel Reovirus from Healthy Grass Carp and Its Dynamic Proliferation In Vitro and In Vivo
Source: MDPI journal article supplement (doi:10.3390/v13040690), 2021-04-16
Supplement: s1 [file s1]

## Genomic DNA sequences and deduced amino acid sequences of the healthy grass carp reovirus (HGCRV)

### Genomic DNA sequences

> S1

GTTATTTGCATTATGGCTGCGGTTTTTCGGCATTACAGCTCGTACCTAAACTCAAACTTCTACGACT  
CGTCGTACATTTTTTACCACTCAGATTTGACCTTCTCCTTGATCGCTTGCAGTCCACCAACTTACAT  
GGTGTATTATACCGAGCCCTAGATTTTAATCCAATCGACAGGTCCGCTACCGTCGTACAAACCTTT  
CCCCCCTTAATGCATGGTCCCCACACCCATCATTCTGTCGAGAATCCGTTGACTACCGCGATTG  
GACCGACTTCATTCATGATCGCGCGCAAGCCTTCGTTGGTGTGCTCACTCAACGATACCCTCTAA  
CACAACACGCTCAGCGCTATACTAATCCTCTTGTGCTTGGTGTGCTTTCGGAGACTTTCTCAATG  
CGCGTAGCATAGACATTTTCTGGAACGTCTCTTCTATGATCCAACACTTGAGTCACCAATCACT  
GCCATTACTAACTTCCCCTATCAATGGACTATAGATTTCATGTCACCGATGACTCGATACGCACC  
CCCGCAGGATGTAAATACGTAGCACTCTACGGCTACGACCCCTCACGCCCCGGCACCCCAGCAA  
CGTATGGCAAACATCGGCCCACTTACGCTACCGTTTTCTATTACTCCACTCGCACCGCGCGCTCCC  
GACTACTAGCGAATCTCGCTGCCGGTCCGACTGTCTTGAACACTTCGACTCCCCACATACGGC  
CCCCATCTGCTAGTTCCACAAACTGGCGACGTTCTGGGTACAGCTCGAGCCTGATCAGCCAAG  
CCGCTCTACTCATGGTGGAGTCAGTCATGGATGCCCTCCGGGACAATGCTAATGCCAGTGCCTCT  
ACAGCTGTCTCCCGCTAGATAACGCTTACCACCCAGTCACCTCCTTCGACCCGACATCCTTCGA  
CACGTTGTTGCAACGTGCCACTAACTTAGCTCTGCTAACCGTCCAAGGCGTCCAGTCCGAGAGT  
GCCATCCCCCTGGTTCCCACGATGTCCGATGTCCGAGTTTCGTGTACGTCTTATGGCTGAAGG  
CGATCCCCAGAGATGGTTCCCTTATCGTGTGGATCAGATACTGCATTGGCCCCGAGTCGCCCTTCAT  
TCCACCCATAGGTCCATTCTACGCGCCATTACAGACCCGTTAATTTCCCATTCACCACCGGCACCTA  
CACCGTCGTCCCTGACGCAACCCGGCCTCTGCGCCTTCTACCGCAGTACCGCAACGTACCATTA  
CCATTCAACAAGCCGATGACGCTTATGATGACACCGCGCTTTACCCCTAATCGTGAATCACGGC  
TTCTGTGTTACCGGCGGCGTATTACCTCTATTACGACATCTCAGGCGATCCAAGTGCCTTCCCA  
GCGGGTCAATTGATTGATACTCCCAACACCTACTTCGATCGTGACCGCATGGCCCCGACGTGACCT  
ATTCCGCCGCCTCCGCGCCCCCTGCCGATCGGTCAGCCATCAAGGATCGTGCCGTTTTTCGACTTCC  
TGGCTTCACTCGTGAACCCTACTACAGCCAACCCCGTCCTTGACACAGGTTTCTCCATGGCATA  
CTTGGTGTCTCCTCCGCTCATGCCACCGCCGATGAACCCGTGATCCTAGCCGACATCCGAGCGGG  
TAACATTCTGTTTGCCCATCCCCCGTCGCATCGTCCAATTTGGCTATGATGTGGTCCATGGCTC  
CCTTCTCGATCTATCCCGCGCCGTTCCGACGGGCACGTTTGGACTGGTCTATGCCGACCTGGATC  
AAGTGGAGGACGCTGGCACTGATATGCCTGCCGCTAACCGCGCCGCCATCGCCATGCTTGGCAC  
CGTCCTTCAGATGACTACTGCTGGTGGCGTTTCCGTCTCTCAAAGTCAACTTCCCTACTCGCGCGTT  
CTGGGTTCAGCGTTCAATTCTATGCGACCCATGCTACCACCCTCCACCTCGTGAAACCAACTA  
TTGTCAACTCAAGTGAGGTGTTCTCTCGTCTTCGGCGGCCGTCAGTCCAATGGTGCCCTGCGATCC  
ACTACCGCTTTGCAGCGCTCCCTTCTCTCATTGTACGCCCCGAATGAGGCAATTGATCGCGCCGT  
CGCTCACCTCCCTTTCTTCGGCGTCCCGGATGACGGTACCTCGGATCTCGGCATAGACGCCGTGC  
GTCTTTTCGACCCCATGTTTTCTGACGCCGTTGCGAACCTCCCGTCCAATCTCTGGCCGCGCTCG  
TTAGTCGCGTCGTTCCCTCCTCGATCATGTTAACGCGCGTTCCATCCAACGGTCCGGTTTCTACCA  
CTATATATGGGAAACGTACCTTCTTGAGCAATCGACGTCGTGCCCCGCTCCGTGACATCCCTATGC  
TGATAACCACCACTCTGGTACACCAGCGACGATTCACTACCCCCCGTCCTTACCCTCTTCGGC

TCCGAAGCCGTCCCCGTCACCACTCTCGTCGCTGCCGGTTACAACTATTTCAATTGCTGAACAGAC  
GCGCAATCCCAATCTGGCGCACCTTCTGGATCTCGGTACCGGACCCGAATGTGCGATTCTCTCAC  
TCATTCCCCCTACCTTGCAGATCACCATGTGCGACGCGCGCCCCTGCGCTGAGCTAATGGCCTCC  
TTCGATCCCGCCCTCACCGATTATATTCAAGGTGATTACTCAATAGCCGCTTTTTGGAATGGGGTC  
CGTTGCGATAGTGTACCGCCATTTTCACCATTTGGGGCTGCCGCCGCCGCAACGGGAATGGACC  
TTATCGCCTTCCTCCAACAACCTGATACCACGAATTGTGCGCCGTGGTGGCACTAGAATGTGGCTC  
CAACTTAACACGCCCTTGTACGGCGCGACCTCCCTACCGGACCTGATTGACATTGATACACGAG  
ATCACGTCTATCGCTTCAACGGCGGCGAACGAGTAGAACCATACTGACCCCATTCGCTGCA  
GCAGGCGATTGCCGCCCTCCTACCCGCCGCCGCCCTGTCATGGCACTCCCTGTCCCCACTTGCG  
ACTGGCTATCATACATCATAGGTGTGCGTTACCCATCAACCTCTCAGACATCGACACAGCGGTC  
GCCTATTCTCGGTAAACGCCCATCCTCCACATAGACACCACCACCCACCACTGCGCGTTAAACCC  
CGTCCCGACGCCCTGAACCAGCAGTGCGCCATTTCGCATCACATCACTTGACCCCGCCGCCGTC  
CTCTCGGTGCAACACAATGGAGTCGAGGTATCGGGGGTACTCCTGGGAACGTGCTACCGTCG  
CCGGTGCTGCAGTACTGCAATATGTGCCGCCGCCGCAAGAGTTCTCTCCAGTTTACCCCGACC  
TTACCCGGCATTTTCGATGTGTTTCTAACTACCCTAGGCCAACCACCCGTCCCTCGTGGGTCCTTC  
ACCATCTCCCCACCACCGACTACCGTGACAATTAACGCTCCAGCCCCCGACAACCTTGACTTCA  
CTGACAACGGCAACGACGCCCAGATCAACTGCGATATGTATTACCAGCTAGCCGTGTGCGTCTTT  
AAGGATGGCCAATACCCCGCGTCAACCCGAGAAAGCCAGCGTCGTGACCAATGGAGCGAAT  
CGTGACCTGCATTTTGTCTCGACCTCTCCGACAACCACGTAATCCTCTATCTGTGCGACGTCACC  
CCCTCCAGCCTCGGAGATCGCATTGCTTCCCTCTCGTGGACATATACCGCGTCGCCTTCCCGAA  
CAATACCCAGTGCGTGCATCCCTCCCATATACCGGTGGCGGCGCCATATACCCCAAGGAGTA  
ACCCATATCTATCACTAACGACCCCTCCAGCAGTACTACCCGCCGGCGTCGCCCTCGCTGCACTA  
TCTACTTCAGTCGCTACACAATACCCACCTACACCCTGCCCCCGGCGCGTACGTATATGTGATT  
GAGTAACGAGCGCCACCTCCGTCAGCCTGCAAGCCAATCATC

> S2

GTTATTTGTACCATGGAGGAATTGTTCAACGCCCTACCTCAACCACTACAACAACCTTCACTAGC  
CCTAGCCGGTGAGATAACCACTAACAGACCACATTTTCGAACAAGCTTCATCCACCTGGCATGTCC  
AGCCCCGCTCACTTACTTATAAATTACTAGATCATATCCAGTTTTCACCCCCGTCGTCGTTCCGC  
CTTCCATCTATAACTCGGTTGACTGGTCTAAGTGTTTACCATCAACCAGGACCGCGTCGAGCGT  
GTACCTACCATCGATGATCCTGACGACGTGTACGTCCCAAATTCAGACATTGGCCCCCTCCTTTC  
GCCCTTACACACTATTCCCGACTATGGCTTCTGACCCTACGATTGAGAACGACGCCACCACGC  
TCCGAGCCGAGCGCGCCCGTTGTGCCTCCACCTTCTACAAGATCGCCTCCTCCCAGGCTAGGCA  
AGTCAAACCTGGACCCCATCCGCATGCTCGGCTTCCTTTTACTCGTCCAATGTCGTCGTCGCGTGC  
CATCAGGACTAGTCACTGACCAACCCTCCAGCCGCTCCGCAGGGTCTTCCCCTTCTCTCCACGCC  
ATTTGGCAGATCATGCAGTATTATAAGGTTCAAGGGACCTACTACGCGCCCGCTCTTGTAAGTGCC  
ATCCGGTGCCATCTGGTGGATCCCACCCCCCGGCAAACGTAACATCGTCTCCGTTCACTACCTGC  
TCACCGACCTCATCAATCTTGCGATCCTTGCTCACATGACCGACATGTCCCGCAGCTTGAACCTT  
GCTGGCGTCTGATGTACCTGCGCGCTGCCTCGTCACATAGCTACGCCTACACGTTACTGCAAAT  
GAAAGGAGTATTCCCTGCTCTCTCACTGCGCTCAATGTATAGGAACAAAGGTTTTGGTGGTAAAG  
CCCCTGCTATCGAGTGGAACGAACCACGCTCCAAGTACAAGTTCAAATGGACAGGAGTCACTCA  
TCTTACGACGGCCTGCGCCCGCGCTCACCTGCCATGGACGACGCTACCATCGCCACCCTCTCG  
AAATACGAACTCGTCGACATCGGCCACATGGTTATCAATATCCGCAATCAGCATCCTCAACACAA  
CCACGACTCCGTGCGTTTCGTCCGAGACACGATGGCATTAAACAGTGGTATGTACCTGGTGGCTC  
AACCGACCATGTCCGTCCTTCGCGAGTACTCCCAAGTTCCGGACATTAAGGAACCTATTCTCCC

TCTGCGTGGACTGGCCCGATTGGCAACGTTTCGATATCTCTTACCGTCCGTCCAAGGACCGGCTAG  
GCATCTATACGACACATGGAGGGCAGCAGCCAGACAGATCGCCCAAGACCCCCAATGGCATGA  
CCCATTAAACCAAGCTATCATGCGTGCCAGTACGTCACCGCTCGAGGTGGTTCAAGCGCATCCC  
TCAAATTCGCCCTGAAAGTCACTGGCATCGTCCTCCCCGAGTACGACGATTCTAAGGTCAAAAA  
GTCGTCCAAAATCTACCAGGCAGCCCAAATAGCGCGAATTGCCTTCATGCTCCTTATTGCCGCTA  
TCCATGCGGAAGTGACGATGGGTATCCGTAATCAAGTACAACGTCGAGCGCGATCCATCATGCCT  
TTGAACGTCATACAGCAAGCTATCTCCGCCCCCACACCCTCGTTGCTAACTATATTAACAAGCA  
CATGAACCTGTCCACCACCTCAGGGAGTGTGTTACCGATAAAGTCATCCCCCTCATTCTGTATG  
CCTCCACCCCTCCCAGCACCGTCGTGAACGTTGACATCAAGGCCTGCGACGCCTCAATTACTTAC  
AACTACTTCCTGTCCGTTCATCTGTGGTGCCATGCACGAAGGCTTCGAGGTTGTAATGCTGACGC  
TGCATTTCATGGGCGTACCCTCAACTATCGTATCGGACCGTCGCAGCCCTGTGCCCCCTTACTCCA  
GACCCATTTCCGGATTGCAGACGATGGTGCAACATCTCGCTGATCTTTACGCGGCTGGCTTCCGC  
TACTCCGTCTCTGACGCTTTCTCAAGTGGTAACAAATTCTCCTTTCCAACGTCCACCTTCCCCTCA  
GGTTCAACCGCTACTTCGACGGAGCACACTGCTAACAATAGTACCATGATGGAGTACTTCTGAC  
CGTACATGCACCCTCCCATGTACATCGCCTTCCCTTAAACGTATTTTATCGGATATGACCATCCA  
GCGCAACTACGTGTGTGACGGGTGATGACGGTATCTTGCTCCTCCCGCATGAGGCTGCGTCTAAGG  
TTTCTGCTGAGGACATGACTGAACTATTGGACTGCTTGTCCAGTATGGCCAACTGTTCCGGCTGG  
AAATACGACATCGACTGGTCCGACACCGCTGAGTATCTAAACTCTATGCCCTGATGGGGTGTGCG  
TATCCCGAACACGAGTCGTCACCCTCCCGTCGGTAAAGAGTACGCCGCACCCAGACAGATGA  
GATCTGGCCTAGTCTTATCGATATTGTGATCGGCCATCACTTGAATGGAGTGACCGACGTCCTTAA  
TTGGAGAGAATGGCTCCGATTCAGCTGGGCATTGCGGTGTTACTCCTCTCGCGGAGGTTATACTA  
ACCCAAGGGGTCAATCTTTCTCCGCCCAGTACCCATGGTGGACATTCGTTTACCTCGGCATTCCC  
CCGATTCTACTTCCTGGCCAAACCCCTTTCATCCACTCGTGCTACATGCCCCAGGCGATCAAGG  
GATGTTCTCGATTCTCAATGGCTGGAGAGATTGGCTCATTGCACACGCGAGCAGTACTCTGCCTC  
CCTTGCGACACCCTCATCCCGTGTGGGGTCTGGCTAATGTACCGTCCGCGCTTACTCAATTCGGC  
GTCTACGCTGGGTACCATGCCGCACAACACTACAGACGCCCCAAGCCCGCCCCAGAGACAGCC  
TCATCCGACTCTATTAGCCAGATCACGTCCGATCTAACTGAGTACTTATTCTATGACTCTGCACTC  
AAGGCACGCGTCATGAAAGGTCGTTACAACCTGGGACCGCATCTCCACCTCTCTATCATTGAATGT  
CGGGTCGCGCGTGCCCTCCCTCTTTGACGTGCCTGGCAAGTGGGTCGCAGCAGGTCGTGATGCC  
GAAAAGCCCCCACCCTCGTCCGTAGAGGAAATGTTACCTCGTTGAATCGGTGCATCCGGCGCC  
CTGCCAGGCCTTCTACGCCTCTTGAGCTGTACCTAAGAGTACATGTTGCTCTCGGTGAATCG  
ATCCCGTTGGCCATCGACCCTGACGTACCCAGGTAGCCGGCGCTGACCCAGCTAATGATGACC  
ATTGGTTTAAAGTACACCTGTCTCGGTGACATCCCTCAGCCACGAGGAACCTTCGGAGAGTCG  
TTGTTTGTGCGACGTGTGCTATCAGGTCTAGATGTGCAAGCCGTGGACGCCACCCTCCTCAGGTT  
AAAGATCTTAGGCGCTCCTCCCCGAGGCTTTTATCGCTGTACTTAACGGTATAGGCATGTCCGATT  
GGAAGCGCACCAAGATAGCAGGACGGATCTACTAGCAAACGCCAGTTAGTTAGATCGCCCCG  
CGTTGTGCACTTGTCCATACCCTCGTCATGGATGACGCTCAACACCGGACCATAACATCATC  
ATGCGTACGACTTTAAGCCCGGGCTGACTCAGCCGTCCGCTAAATCGCGTGACAAATCAGTGTG  
GATGTCCCCGATCCTCAAGCTCCTCTGCACCAGTTACGCCATGACGGTCGCGGGGCCAGTGCGT  
ACTTCCATCGTTACGGAAATTGATGGTTCCGCCGCGCGCTTAGTGGAACCTTACGGGTGTGGAT  
GCGTGATGTGTAGTGGTTGACCCTTGGCGTCTGCATGGTGCTCAATTCATC

> S3

GTTATTTCCACCATGCCGCGCCGATCAGCCCGTAAAGCTCAATCTGCCACTAACACTTCCGCTGA  
CACGAACGTTGTGCCTGCCACTGACGCACCGACCAGCAACTCACCACCCACTACCATCTCACCA

ACCCAAGCCGCCGCTGATGCTAATCAACAGCATGCCGGAATTTCAACTTCACAGAGTGGTCCAA  
ACGCAGTCGGAGACTCAGCCCCCTCCACCTCAGTTAACAACGATGGAGATATCATCACCCGCCC  
GACTTCTGATAGTATCGCGTCCGTCGCTAATGCTACCAAACCCGCCGCTGTGCTCTCTGACCAGC  
AGGCCATGAAGGTGACCCCCATCGTCAACCCGTCCTCATATGTGTGCAACGTCTGCAACGCGCG  
TTTTTCCACGATGTCCGCCCTCTCGGAACATTGCGGTCCGACCATCGCGACGACGCCTCCACCC  
TGTTAGCCACTCCTATGATTAACAACGCCATTTCGCTCTTTTCCTTACAGCATGGGATGGTTTGCGTA  
TCCTAGCGCCAGATATATCCTCCAAGGCACTCTCCGCATACCTTGACAGCGCCGTCGCTAATGGT  
CCAGAACTGATCATTGAGGACACTGGTCTCTGCACCTTCTTTCATGTTGCTCGATAACATTCCGTCT  
GCACACCTGACCGAGGAACTGATCGGATTACCTGGTTCATGCAAATGTATCAGATGACACCCC  
CCCTCCCCGAAGGTGCTGTCAACCGCATCGTATGCATGACGAACTGGGCATCCCTGGGTGACGA  
AGGTCGCGGATTAGAAGTGCGATTACCCCCCTCCAACCGACAGCAGCGTCCACGCCTACAAAAC  
CGTCTGTCCCGTGGATACATTGACAACGTCCAGTTCAATCCCCTCGCCCTGAGATCAAACGTAC  
TCTTAATGCTGCTACAGTTCACTCTATCCAACCTGAAGATCAACAAGTCATCGACATTTACCTCGG  
ACGTCACACTACGCTCACCTCTGGCCGCATGATTTCGCGCTTTCGAGGGACGTACCGAGCTTTTGGCC  
CTAGCGTATCCAGGACGTGCTGTCTACCGACGCAGACTAAGAACGCACAATTCCTCTCCACCG  
CCATTCTGACAGAATTGGTCGTCTGGATCGTGCCAATCTTATAGGTGGCGAAGTCAGCGCTATG  
GTCGAGTGTATGGAATTGTGTGACGCTCTAACGCTAAACATCCGCGAGACGTACGTATGCTGCT  
TCGCTCCATGCACCAGGATCCCACGCAGATCGTCCAATAGTCAATGAATGCGCGAACAACCTT  
CTCAACTCTACCATTCCCATCAGCCTTCGCCCCACTATTCTCTGCCCCTGGTTCGCCTCATCTGAA  
GATCTACGCCTCCAGCAAGTCATGCACCTTGTCACATCTCCTCCAACACGGCCGCTGCACTCCC  
ATTAGTGGAGGCCCTGTCTACCCTCCTGCGATCCGTGACGCCGTTAGTCCTCGACCCTACCGTCT  
AACCAACGCCATCACGACCATTTCGAATCCACCACTCAGACAATCTCGCCGATTCAGAGATC  
CTGCGTTTGCTGCAACCCATGGGAAACGATTATGCCGCAATTCTGGAAATGCATTGCCAGTTGGGC  
GTACAACGGTCTCGTCACCACCGTCCTCTCCGAAGAGGCCCTTCCCCGACAGTTCCCAGTCCATC  
ACTCACCTACCATCCATGTGGAAATGCTTGTTTCTCACCTCGCCGGACCCATGACCTCCGACCC  
TCATTCTCCCGTGAAAGTGTTTATGGCCCTCGCCAACCTGCTCGCCCAACCAGAGCCCATCGCGA  
TCGGCGTGCCCGGAATGCATCAGACGACCCCCGCTTCCAGTTCTCTCACCCAGGAGTCTGGCC  
ACCCGGTTTCTCAACCTCAACTCATCAACCCACAGCAGGCTCCCTTGCTGCGCGCCTTTGCCG  
AACACATTAGGGCTAACTGGCCGCAGCCAAGCGAATTCGGTTACGGCAGCACGTTGCAGGGCTC  
AGCCAACCTCTTCATTCCCCCTAATCGCATGGTGTACCCTTGGCCTAATCAGCCTCTCCCTCGGCT  
AACTGTTGCTCCGACCTATGACTCAGCCATGTGCAATTGGATCTCCACCACCGTCGCATTCTTCAT  
TCGTGTCTGCTCAACTCAGTGAACATGACTGCCACCGTCAATGACTTGACCCGCCGTACTATGACCG  
GTGTCATGACTGCAATGAGGCAAGTAAAGACAATGACCCCATCTACATCCAGCACATGTGCC  
GACTGAACTTTCCGTCTTAGCGTCCGTTACCGTCACGCCACCCTTCAAGTGCCCTTACCCGCTT  
AGTGCAGAATGACGTCATCACCAACGTA CTG TAGCGCGCGTTGATCCTGCCCAACGTGGGGAT  
GCTGCTGTAGATATTCGTGCCACTCACGCGACGTTGCGCGCTGCGTTACCCGTGGATCCCGCTTC  
CATTGTCTGATGCAATGTTATGTGGCCAGACGGAACTAACTTGATAACCATCTCACCACTACGGTA  
AAGCCTTCGCCCCGTTATTTGCGTCCAACGCCATGTTACGCGGAACCAGCGTGCCGTGATCACT  
CGTGAAGCTTTCGTCTGTGCTCGCAGTGCCGTCGCCAGTGCCAAGATGCCGGTTTTCTCGTCCC  
CAGGCCCCCTGGACGCCCTCCGACAGTTCGACGTGACGTCAGCCGCAGCCGCAGAGATTATGCA  
CGCAGTCAATGACGCGTTCAAGACCGCCTTTGACCTGGACGGCGCACTCCTCGATGGTCTGGCT  
CTATACGGGGACCCACGTATCGCTGACCTATCCGCTGCATATCTGCAATATGGGGGAAACGTCTG  
CCGCGAGCACGTACCACCTGGCACCTCACACATCCATCGCGCCCTACAGCAAGTCGAGTCAACG  
TTCATGGCCGAGATGAACTTGTTCAACGTCGCCCCGTGGGGACCTCTATCTCGTGCAGACTGCTAC

TAACGGTAATTGGTCTCCCATGGCCCCCGTCGCTGCCCCCCCATTTCGTACGCGGAGGCCCCAACG  
TGCGAGTGGTCGGCCGATTTCGGTACCATCGTCCCACGCCCCAACGGTCTGGAACCCCAACTGAT  
CGATGATGCCAATGTTCCCCAAGATATTGCTGGCGATTGGGTATATCCAAGCGACGTGCTACAAG  
TATCGGTAGCTGTGTTCCGAGATTATGTATGGCCTATGGTTAAGGCTGGCCGGACACGCGTCCTAA  
TCGAACTGGGGCCACTACGTCTACACCCTCCATTATTACGACCCTCAGATCAGTCTCGACGAAGCG  
CCGATCCTGGAAGAATGGCTAACCCACATAAACCCGGCCGGCATAACCACTGTCCCCCTTCTGCAT  
CCCAACACCACAGGTCTACCCATGTATCACCGCCCGACGTGTCCACTACGCCTTCACCTCAGAG  
AATAATAACGATTCACTATTCTCTACCAACGCCGCTTCGATCGACACAGCCTTCGGAGAAAACG  
CGCCGTCTCCCCCTCCGCTGGCCCGGCTCGTTGACCCCAACTACCGCGTGGGCACTAACGAC  
CTCCCCAACCGCATCACCTCTATAACTCCCTGTACAGATACAACCTCACCTACCCGACCCTCGA  
TGGCATCATGTACGTGCGCAGCGCCACTTAATGGCGAGGTTGAGTAGGGCTCCCTGCGGCTCTTG  
GTGCTTTTCATC

> S4

GTTATTGAAGAGCTTTGGAAGTAAACATGGCACGCCGCATTACTTTGAACAGTCTGAAACCTCTG  
AGTGCGATGAACAGTCATCCCTCTCTGACTCCCACCACTACCCCCACCCCGCGACCGCCTCAA  
CCTCCGCCGCTCCTTCTAATGACTCCCCAGCCACCGCCTCCCTCCCAGCAGCGTTCAACCAACTC  
GTGTTTCGAGTTCAATGGCGTGAAGTACACCGGTTCCCTCACTCCTGGATGATGCCATATCGTGG  
ATTGAGAAGCACATGGTCAATATGGTGCTCGACACCCGCCCCGACGCCACCTTTTCCCGTTTCG  
ATGATCTCCTTTCCGCCATCGTATCCGCGCTTGCAGTTAATGGCGTCACGGCCACCACCCCTTCA  
ACGAAGGTGAGCTGATCCTGCTACGTTTTGCCTGCCTGAAGACACTGCGTGCATCCGCGGCCGC  
ACCCACCCCATCCATCTCTGATTGGTCCGACTCCACGCCTGGTCTCTCCTGGACTCCCTCGACTA  
TGGCCTCCCACCTTTCCCCCTCCTGTGAAGCCGCCCTCCCGTCCTCGAACCCCTCCGCCACTCAC  
CGTACCACCCCTCCACCCTGATCCCGCGCTCTCCCACTCCCTCGTCCCCATGGATGTACCCGAC  
TCGGTCTTGTTCCTTCCCTACGCCTGCTACCGGCGCCGTCATCCCCAGTCTGCTGAGCCTG  
ACCTCTCCACTCCGCCCCGCTCCCGCGCCAGCACCGCATCCTCCAGCTCCACCCAGCCGTAC  
CCCGCCTTTCCGCTGCTGCCACTCCTCGACGCCCACTCACATTGCCGACGATGAGACATACAA  
CCGGTCTCGAGCCGCCCTACGCTATGGGAGTGCCCGCCCTGTCCCCAATGTACTGCACTGGTAAG  
GAACGCCACTTCGAGCAAACCTTCTACTCCGCCTATCCCCACGCCGCAAACGGGGTCTGGACCG  
CCTATCAAACTCCATCATCCTCATCGCCGCTCCCACCGAAGACATATCTCTACTAACACTGCATC  
ACGTCGAAAGAGAACAGTCTGCAACTGAAGCTTACCATCTCCGTGCCCTCGATGGAACCAACGT  
CGCTCGCGTTGCCGTCTGCCGCTGGACCCATCCATGACTTGTCTGACGTTACGCCATGATGG  
CTGGTCACAATGTCGTTTCCATCTCTGGTTTAGCCGCCGCGTTTCATGATCCGCCACCGCCTCACCG  
ACGGCGTGTTAGCAAAGCCTTCCGCCGTATCGTCATGGGCATCGACCCCGTCATGATGAGACA  
CGACCCCGTCCCCCTCCACCTCTTCGCCATTCTCACCGACCACCGTCTGGACCACGCTGCCACCC  
ATGCTGTCAATGTCATGCGTATAGCGCTCATGCAGGTCGAGTCAGCTTCCCTACCAGGCGACGAAG  
ACTTGGCTCCGTGGACACCTCCCCGTCACTATCTTCGCATCAGCCACCACCGACTCATCCTCCGA  
CTCCATTACGCCACCATCCTGGAAGCTGACAAGGGAATGCGTACCGCCGATACCCCTGGCTCC  
TCAAATCTACGCGAACTCGAGGCATCTAATGCCGCCCTCCAACGCCAGGTCATCGATATGGACGT  
TCAAGTCAACGCACTCCTCCGCACCATCTCCGACCTCAAGAGCTACACCAACCATCAACAGGCT  
TCTCAGGGACAGACCATCCAGCAATACCTACATTCCACGTCTGCGTCAACACCAAGGAACTCG  
CCGTAATCCAAAGCGTCATGGGGGAGCACGCAGCCAACGCGATCCAAGCAGTCCGCGTCCACG  
CCAATGACACCGCCAAAGCCGCGCTCTCAGAAAAGGTCTCCGTGCCCCCTACCGCCCAACTGTC  
CGACACACTCGCCACCTACATGCTGCGCGGTCCCGCAACGATGAACTAGTCGCCCAGTTGACC  
ATCGCCGAGTCCGAAGCAATGGCTGCTGCTGCTGAACGTGATCAAGCATGCGAGCTGGCATCGG

AGCTTCAGACTCAGGTCGCCGCCATGCAGCAGGAGTATGAAAACGTGACCCGCGCCCTTATGCA  
GGATAACGAGCAACTGCAAACTCCGCCGCCACCGCCGAAGCAGCCGCCACCTCCACGTTCCG  
ACCCACCCCCCCCCCTCGTTTATGGAACCGCGCCCTCCGCTCTCCCCGCGCTCGGCCCAGGTCTCA  
CCATCCCCCTCCTAGCTCCAGAAATCGACCCCGCTTCTCTATTCTGTAATCGCCTGTGGTTTCTC  
TGTTCTGTGTCGTGTCCTCTGTTTCTCCCGCTCTCTCCCCCTTCATC

> S5

GTTATTTGTAGCTAAGGATGATCACCATCGTGGTTATTCCAACAGCCCACTTTTCCTGGACCGATA  
CCAACCTCTTAAATTCCGTCGATTATCGACTAACCACACAACCCAAAAGTAGAGACCGTTTCGCT  
GTTTACGCCCCCGGATGGCTTCGACGCCAATTGGATGAATTTTCAGCGTCCCTCACCGCTTCTGA  
ACTCTTACAGGCCCTAGAATCTATCCCCATCCCCGTGAAAGCCCGCTGCCTGCTGCTACCTAAGC  
CCAAACGGTTCGCCCAGTGGCTATTGGACGTTCCCGCTGCCAATCTCTGGCACATTCCCGTCACC  
ACACTTCGCGCTACGGTCGCTTCCAAACATCCTTCCTCGGACATATTCAATTTTCATCGCGGACCA  
CGTACCTCCCAACGCCGAATTCGATACGATCACCAGACGCGTACCTGCGGGTAAGGATATCTAC  
GTCAGGACCACTAAAGTTATCGGGGCTCCCTGTGCCTAGCAGCACCAGCTAAGTACTACGCCG  
GATATCTGTCAAGTCACCAGTTAGATTCCATTACCCTGACGGCTGGTCCCCTGAGACGTTCCGTA  
AACGAGAATACTGTTTAAACATTCTCCCTTCGCTGTTGGGTCCACGCACATTCTCTCGATGTCG  
ACGCTGAACGTGATACCACTATCCGCTATCTGTGCTCTGGCCACAACCTTCGTGCCGCAGCCCTC  
AAATCGCGACTATTACTACCTCCAGTGGCGTTGCTACGTCGTGTCGTTGACCCATCCCTCAAACCT  
ATCTGGTCTGCTGATACAGATCCGGCTTTTCGAGCTTTACGACTATCTCGCCCATCCACAGCCTCC  
AGGCCGCGCGGCTTTGATTTTCTGCCCTTCCCATCGCCGACCTCATCTGCCTCTTCGAATCCGAA  
CCCGACTCACACGGGCGCACCGCCCCCGGCACCAGGCTCACCCTCCATGCCGTACCTACTGATC  
TGCTGACCGCTCTCTCGATTCAAGAGAATGTGCGATACCCATTGCGACAACAGAGTGGCATGTTT  
GTACATTGGGTACTGTTGGCCCTACTTATGTCCGACGACGTTTCCGTACAGGCACCCGCCGTTT  
CATTAAAGATGGAGACTGCTCAGCTTCGGCCAAGCCGTTTGTCCACATTACTATCGAACGGTGCG  
TGTCAGCACGACTCATAGACGTGAGAGGATCAACCGCCATGTACGCAAACGCCGTATGTTTGAC  
CTTACCCAAGGGCTCGTACAAATCAACGATCATTGACACCCTCCCGGCCATGTTCCCCGACCTAC  
CGATTCTTGACTCCAATGCCGTATCGACTCTGACGCCCTCGGCGACTCACTACGGCCGTCAATT  
GAATTACAGTTCCTCGAGCGGCTCAATGTCTGGACGCCGGTGTAATCGATCGTGCCGTGCGATC  
GATTCTCAACCCAACCAGTGATACATCCGATGACGCAGCAGCGATGGTGCTCGAGACGTTCAAC  
AGTCTCTACCGTGATGTCATGACGCCCGCTCAGCGCACCCGCCTTCCTTTCCTTACCCAACAGGG  
ACGTGTGCTCGCCTTCGCCCCTCCGATTATGAACTCCTCGCTGCTAACATAACCATTCAGTCAT  
ACGCGGGGCCATACCAATTGATCACGTCGTAAATCTGCTGGCACGTCGAAATCGCGTCGGCGGC  
ACTGCTCTCCAGGTACTCCTAGACTACTGCTACAGGACCCAAGCTTCTCCGCTTGCCACCCAGCC  
AGCAGGTGCTGTGATCAAGCAGCTTTTCGGTCCCTGGCTAATGGTTCCGCGACTCGACACCCCG  
CTCATCACACTACGCCTGACGGCGACCGCCCCCTGCAAAGGTCTTACGCGCAGCTGGATGGACCG  
TCGACGGTGACCCACCCTTGTCAGTGTGATGCTGCGCGCCTACGTACCCGACCGGAATCGGC  
CGCTTCCCTTATTGAAGCACGTTTGGACTCACGCGCCCTAGTCACCATCGACGGCGACCATGATCA  
TGTTCTGTTGAGTACGCGCCACCCCTGCCACTCGTGTCAATACCACGCACGTTCTACTGCCCGTT  
ACATACGTGGCCCACTGGGTGCAACCCGAGCGCGTCCTATTACACGGTGGAACGTGTCCTTCA  
CCAGTGGCCTGGAGTGGACCTTTGCTGATGATCCTCAGGGTGTACCCCGGCCGGGGTTGAGC  
AGGCCGGGGATCCCTGACGCTACGCCAATCATC

> S6

GTTATTTTCGACACTCCGCACTCTCTCTACAATGGGGAACGTTCAAACCTCCGTCAACACTTACAA  
CATTAAATGGGGATGGCAATTCTTTGCCCCACCTCCGACATGACATCAACCGCTGCACCCGCCA

TTGACCTGAAACCCGGCGTCTTAAATCCCACCGGCAAGCTCTGGCGTCCAGTAGGTACTACCGTT  
GCAACGGTTGATTATTAGCCATCGTTAGTGATCGCTTCGGTCAATACTCATTCGTCAACGAGAA  
CATGCGCGATACATTTCGCGAAAGCCCTATTTGACATCAATATGTGGCAACCCCTATTCCAAGCTA  
CCAAGACTGGATGCGGCCCAATCGTCTCTCGGCATTTACCTCTACCACATCCGGTTACGTTGGC  
GCTACCGCTGGCGACGCACTCGATAATTTGTTACAAACGGCACATTCATCAGCTCGGTCCAAAT  
CCTAAATCTGCAACGCACTATTGCTGCTCGCATGCGCGATGTCGCCCCACTGGCAGAAACACTTG  
GATACCGCGATGACCATGTTGACACCCGACATCTCGGCTGGTACCGCTTCCTGCAACTGGAAAA  
GTCTGCTTGCCTTCGCTAAGGACATCTTGCCCCCTGACAACTTATGTCTGACGTACCCTAATGAGT  
TCTACAACGTGGCCGTAAGTCGATACCCCGCCCTGCGCCCAGGTAACGTTGAGACCAAACCTCCC  
CGATGCCAGTCCCATCCACTCGGCGAAGTCGCTGGAGCGTTTAATGCCGCCACGTCTGAAGTC  
GGAAGTCTAGTTGGCTCTAGCTCCACTCTGTGCAAGCGATATCCACCATGGCTGGCAAGGACCT  
AGATTTAATCGAAGCGGACACCCCACTCCCGGTCAGTGTGTTACACCATCTCTCGCCCCGCGCT  
CCTACCGCCCAGCTTTCATCAAGCCTGAGGACGCCAAGTGGATAGCCGAATTCAACAACCTGC  
CGTTATTCGCCAGACCTTATCCTACGCCGGCGATGATTACACCATCCAACCTTGGACCTGGACCAA  
CTCGTGTCAATCGACATGAATTCAATGATCGACGCCGTGCTAACCCTCGACGTGAGTGGGACCCCT  
CTCCCTTTCCAACAAATGCGGATCTCTCATCAGCGATCCCCGCCTTTGTCTCATCCAGACGTC  
CGTCCCAATCCAGCAGGTTACCTCTGCATCAAACATCACCGCCGTCAGTGTCTCTCCGCCGCGG  
AAGCCTCCGCTATTAACCTGTCTGTGAATGTGCGAGGCGACCCCCGCTTCAATATGCTCCATCTG  
CAAGCGACGTTGCAAAGGGAGACCATCGCTGGTATTCCATACATCTATGGACTCGGCACGTTCTCT  
CATCGCTTCGATCACACCTCGTCAGATTTCTGCAATCCCACACTGATGGACGGTCTACTTACTGT  
CACTCCAGTGCTGCTTCGAGAGACCACGTACAAGGGCGAAGTCGTGGATGCCATCGTACCGGCC  
ACTGTCATGGCAAATCAGACATCGGAGGAGGTGCGCTCAGCGCTAGCAAACGATGCCATCGTGC  
TCGTCTCCAATCACCTCACCAAGCTGGCCAACGTGGTTGGTGACGCCATCCCAGTAGCATCTAA  
AACAGACGACTCCGCCACCAGCGCTATCGTGAGCCGCCTGGCAGTGCAACATAAGCTATCTCAA  
GTGGGGCGCACCAATCCGACCCCCCGGATTATCCTCTGCTATGGCGACGAGCTAAGCGGGCTG  
CATCTATGTTGCTTTCTAACCCGGCGCTTGCCCTCCAAGTCGGAATACCCGTTCTGACACAGTCC  
GGCATGCTATCCGCCCTCACGTCAGGCGTAGGCACGGCACTCCGCACCGGCAGTTTGGGAAAAG  
GGGTAACGACGCTCCGAGAACTTCGCGCTCGCCAAAGTTTGACGGTGGCCAAGCAGACGT  
TCTTCGACCAGATAGGGAGCCTGTGGCCCGCAAGTGAGGGGTGGGTGACAACCCCCCTCCGC  
GCCCCTTGAACCGCGGGGGGTGTCGTACTTTCATC

> S7

GTTATTTGAACCCATGCCTTGCCAGGATACTGTTTCTCTATCTATACAGCACACATCGGTCTACGT  
CCAGCATTCCTGTTGCGTGTCCACAACCACCTCAGCCTCAACTTCTGCTACCGCTCTTGCCCTCG  
GTTGCATTGCCTGCGGGATCATCGGCGTTATCGTCGTAGCCAGTGGCCTGTGTTGTCTTGTCAATG  
GTCGGTGCTCCTATTGCCGAGGGTTGGCTCTGCGGTCCAGTTCCTGGAAATCCCCTACAACATCA  
CTGCGCACTACCAACCTATCTCTTCGGTCTTCGTCACCTTATTGGGACTGATCTTCGGCGCCCT  
ACTCATTCTCGTCTCTTGGAGCTGTTGTCAGACATTCATCCTGTGGTTCCGAATCGAGAGTGCCCT  
CCGCCATACGATTGCTTACTGTTGAACCAGAAGTCCACACGCTCAGACACTTCAACCCAGC  
CCAGACTACAACCGCCCAGGTGGTAGAGATCCCAGCCCCAACACCAATCCCTTCGTCTAACATG  
AACACCAATCGCTCCCTTATCGACGAGCGCTACGACTGGATCGTTGCGTATGAGCGCCACATTGA  
GCCCCAAGCTATCACCGCCATCCGTAATCCCGCTACGGCGCCCTACCCCCAACCCAGATTCCA  
AAGTTCCTAGGCCCCAACCCCAAATACTTTGTGTACGACGGAAACGTCGAGGAGGTTGAAGGA  
CAACTGATCAAAGACCCTTCAGACGACTATCAACCGCGCCGCTACGCTGACACGTGGACATGCT  
CTCTGTTACGGAGGTCCCCCCTCGCACCCAAGCTGGCCTCGCGACACTGTGCTCAATATGAC

TCCACGTGGAGCCCCTATCACCATGTGCCGATGCGCTACTTCCCACGGTTCATGGGACTCGAAGA  
TGACCTCATCAAACCGAACGACGGCTTCTGGCCAATCCTACACCGCTGCGCCGGATTAGATTTC  
GCTACCCGTGGCGATTTCGACCTCGACGCACTCGCCGCCGAATCGGAACCACCGTCGACAACAT  
CCGCTGCATCGCCGAATCCGGTGCCTTCGCCACCGTCGTGGGTACTCTTCGCGCCATGGGCTGGA  
AGTATCACCACCTCTCTGGCCTACGGCCCCAGCACGTCAATATTGCGTATCCGCATGGGCATTAT  
CTTTCACCCGTGAACAGCTCGACGATTATAAGCCCCGAGCCTGGTTCGATGACCTTCTGCGCGTC  
CCAATCTACCCTGACGAACAGCCCATTGGCCTAAACCGTGAACAACCTGTTCACTACCCCTTCGT  
GTTGCTGAGCTGGATCAGGATTCAGTTACTAGGTGGAGGCGGTAAAGCTGCGGGAAGGGTCCTT  
TTTGACCCCGGGGTTCCGGCCACCGCGGCGGCGCGGTTTCGAAGCGTTCATC

> S8

GTTATTTTTGTGATGGCACAGCGTCAGTTCTTCGGACTCACCTACAACCTTTTACGGCCAACCCGCC  
CCCTTTATGATTTGAACGATTTACAAGAAATTGCCGTTGCTACGCTCGCCCCTGGACTAGCCG  
GTTCAGTCACCTTGCCATTTCCACCGGGTCACTTCCAGTGTGGTCTGCCCCGTACCCCAGCGTCG  
CCGCCAGAAACATCATCATCAACACTATCCTCGGCGCACATCTCAATCCTTTCTCCGGTGGTCAG  
ATCACCAGCCATCAAGGTATCACTTGGCGTGACCCTGTGCTCTCTTCACTAGTCCCAGTCCCAGC  
CGTTCAACCTCCACCAGCATGGGCGGTGCGCGAAAACGTAGCGTTGGATTGGAACAACCTATCCT  
ACATACGTGCTAAATCACTCCGCCATGTGGCCAGTCAACCAGGATGTACATGTGATGACCATGTG  
GGCTTTGTCCGATCAAGGACCGATCTACCGACTAGAAGTCCCGGCCGCACCCATGCCTGCCGCC  
ACGACTGCAGCGCTCATGGCGTACATCGGAGTCCCGCTAGCCCATCTGGCCCAAACCGCCTACA  
AGTTCGCCGGTCAGCTGCCCCAGTCACCCGACTCAACTATGGTCTCTACCATCCGCTGGCTGTCC  
GCAATATGGTTCGGGTCCCTCACTGGACGCTCAACCGCTCTCGCACCTGCAATGGTTTTTACTTC  
GAATTTGCGAAGCCCTCCTTAAACCCTGACCAGGCCATCCTTAAATGGAACGATGGAGCCCGTG  
TCGCCGCCCCAGCCGCCGCCAGGTGTCTACATGAGATGCATTTCCCCCCTGCGCAGCATCA  
GATAACGGAGGTCGCCGGCGCCATCATGAGCCAGTCCGTACCCGAGTTACAGGTCTGGCCACC  
CTGATCGATGAGGCCACACTTCCCGCGTGGTCCCAAGGCGTAGCTAACCTTACAGGTAACGGCG  
CTGGCGTCACCCCTTGTCTGGATTACAATCCCGTTCCTATGGCGGCGGCTAGACACCTGCAATGG  
CGTCAAGACGGACTAATAACTGCCGCCAGGAAGCCCAGATGAATGCCGACTACACAGCCTAC  
GCCCTTACCATCGAGCAACACCTCACAGCTATGCTCGCCGCCAATCCCGTAGCCGGTGGCCGCA  
TGCCCATTC AACCGTTTGTGTCAGCTGACTTCGGCCAGGCCGCCAACTGCGGCGGCGGTGCG  
TTTAGCGCAGGCGATGTTCTGCTAACTTGGGGTGGGCTGCTCCCCCTCCCCCGCTGCCTCACGCG  
TTTCATC

> S9

GTTATTTTGAGCTTACTGATTGACAACCATCATGGCACACACAGGCACCGCTACTCTGATCAATG  
CCGAACGCACTGACAGAACCCTCCGTCTTCTTGAAACTTCCCTTCCCTGACAATCACCGTCCGC  
CAAGACACGTCTGGACGCGACCTCATCTCCTTACCTACTCCGCTACTGGCATGTCCGCTGCTGC  
TCGCAACCTGAATCCAATCGCAAATGTTAAGAACATGCGTCAGCCCCGTTATGTCAAGCCCGCT  
CACACCCCCACTAACACCGTCCCATTGCGAGTTGCTACCTCCACCGGCCTCGAGCTGCCACCG  
CTCACCTCGCCCAAATGCCCGTCGACCAGGCGTCCGTGATGCCGTGCGCGCCGCTGTCCCTAC  
CCACGCCGCACATGTGTTGCCCCACAGGTGGACCGTGTACACCGCTCACACTAGCCGCACGC  
GTCCGATGGTATGTGCTGGTCTCGACTGTGACGACATTTCATGAGATACCCCCCGTTCCAACCGC  
TATGGCCCTAGCCTTACCACTAAAGTGCTACTGATCCATGTGGTCGTTGATGGTGACCGCGCGT  
CCATCGCCGTAAACCCCGACCCCGCCCGTGCCCTGCTTCATGCCGATAGGTTAGGCAACATCATC  
ACCAATTATGGATACGATGTGCGTGGAACCGTTCGCCGTGACGCCGCCGAGCGCTCGCCCCAT  
CAGAGTTACCTGCTGCCTACCCGATTGAGTGGCTCGGCCTCATCTGCGGTCTCATTGCTACCCAA



ATCGAGCTGGATCTCGACATGCTTGCCATGAACCAGACTGAGCAGAAACTCGTTGCTCCACACG  
TGCAGGCCGTCGACCCATTTATCAACCGCCTGCAGAGCTACGCCACGCTTTCAGCCCGCATCATG  
CACCTGTGCGTCACTCATTCCCAACGCCCGTTCCGCGACTTCCCTGAGCTGCTGAGGCACTGGC  
AGAAACCCGAGCTTACCACCGCCATCCCTATTAACATCACTCTCAGGGGAGCCGCTCTCGAGGT  
GTCCGGTAACGGTGCCGAATTGTTCCGCGTGAGGGCACTGCCAATCGGGGGCATGTAGAGCGTG  
GTCACCGCTCCCATGCCGCTCATACTATCATC

> S10

GTTATTTCTGAGCTCCCAATCATCACCACGATGCCACTCCACATGATACCGCAGGTGCGCCACGC  
TATGGTGCGTGCAGCCACCACCGGACGTTTAACTATGTATACCCAAACCCGCACTGAAACCACT  
AACTATGACCACGCTGATTACATCACATGCGGCCGTTACACCGTCTGCGCCTACTGCCTCACAAC  
CATCGCCCCACATGCCAATGTCCAAACGTTGCCATCAGATCACTTCTGCCCCCGTAAACCTAATG  
AGATAGCCGCCACCCTAATCGAGGTGAGTGACAAAACGAGAGCCGCACTGGCACGCAGCCGA  
ACCATTGATTATCACACCTTAGCCGTGCAAGCTGGATTTGTCGAACCCACCGACGACGACGATTC  
GTCTATATCCGGCGATATCACTGAGCTCCCCTTCCGTACATGCGATCTGGACGTCGCGTCCGCCTC  
AGCTTGCGTCCGCTCCCACTGCCAGGCCGGTCACGACGGGATCCACAGTCTGCCATTATGACC  
GGGGACTTCAAACCTAACGAACGCGTGCATCGCGCATGGGGAACCGGCCAATCCCAGAAT  
AAGGTGTTGACGAGGTGCCCCACCACGGGTCTGCTTCTAGCCCACGACACCCAACTCCGTGCCA  
CTTCCGTCGTCGAACGGCCGCTACCCGTGCCGTGTTAATGCACAGCTTGCTGACGTCCGCTAAC  
GCCTCTGACGGGCCGAGACACGCGCCGCTTGCTACGGACCCTCTTTCAGCAACCTACCGTACG  
CATGTCACTCAGCCTGTTCCGCCGATATGGCCCATTTTGATTGCGGTATATCGTTGGTCTCGACC  
TGCACGTGGAGCCATCCGATTAAGCGCCGGACTACCCACCCGGTGTAGGTGTAGGGGTCTCAGC  
GTATCATC

> S11

GTTATTGTTCTCTCCCTTGCGTACACGCCTCAAACCTCAAACATGGCCACCGCTGGAGTCACTA  
ATGCGATTGACGGTCTCATCCTCAGTCGTTTAGACGAAGCAATTACCAATAACCCCACTATCCTA  
CGCCTGCGCAAGAAAGTGTCTCCCTGTGGAAGGCCTACGATAACCATGTGCGCGACCCAAACGG  
CACACGAGCTCCTCACTATGCCCGCGGACCTCGCAGAGTTACCCCCACCCCTCCCCCCCCACTGC  
CGAAGAACTGAACTGCAGCTATTACGCCACTGCCCCCCCCACCCACCTCCGGCCGTAGATACG  
CTCTGGGGCACCGCCAGCTATGAAATAATCGGTGCGGAGACGCGCCTGGCCTCCAGTGAGAAA  
GCGCCCCGATTATCATCCACGTGACGGACGAAACCATCCGCCTAGAGGTGCCACAAATGGCAT  
TCACCCTCCCGAGCGCGTTAGCCACGGGTTGCTGCTACGCGTGACGTTCCAAAGGGAGCAAT  
CCACTCAGCACTGACTGGAAAGTTCGATGAACGATGCTGGATTCTGCTGACCGCCACCCTCACC  
AAATGGATGTCCCCAGCACGGTCGTACACGCGACTGGACGCTCGAAACTCCCCTGACCTCA  
TCAAGCCACCAGTCACTGGCTTCAATGCACGTGCGACGCTCCGGGACTCATCGCTCGTCCTCTG  
GTTCCCAGCCCCAAATACCTCTATGATAGCACGCCGCGCAATAGTGAGCCCCATGTCGTGCGTGT  
TTGAATGAGCGGCGCAGGGGTGACCACCCAGGCGGGGAGGTGTCTTTCATC

### Deduced amino acid sequences

>S1

MAAVFGIQLVPKLNSTTRRTFLPLRFDLLDRLQSTNLHGVLYRALDFNPIDRSATVVQTFPPLNAWS  
PHPSFVENPFDYRDWTDFIHDRAQAFVGVLTQRYPLTQHAQRYTNPLVLGAAGDFLNARSIDIFLER  
LFYDPTLESPITAINTFPYQWTIDFNVTDSDSIRTPAGCKYVALYGYDPSRPGTPATYGKHRPTYATVFYYS  
TRTARSRLLANLAAGPTVLEHFDSPYGPILLVPQTGDVLGYSSSLISQAALLMVESVMDALRDNAN

ASASTAVSRLDNAYHPVTSFDPTSFDTLLQRATNLALLTVQGVQSESAIPLVPTMSDVRSFVSRLMAEG  
DPQRWFPYRVDQILHWPESPFIPPIGPFYAFFRPVNFPTTGTYYTVVPDATRPLRLLPQYRNATITIQQA  
DDAYDDTALSPLIVNHGFCVTTGGVFTSIHDISGDPTAFAPAGQLIDTPNTYFDRDRMARRDLFRRLRAPA  
DRSAIKDRAVDFDLASLVNPTTANPVLDTGFSMAYLGASSAHATADEPVILADIRAGNIPGLPIPRRIVQ  
FGYDVVHGSLLDLRAVPTGTGFLVYADLDQVEDAGTDMPAANRAAIAMLGTVLQMTTAGGVSVLK  
VNFPTRAFWVQAFNSYATHATTLLHLVKPTIVNSSEVFLVFGGRQSNGALRSTTALQRSLLSLYARNEAI  
DRAVAHLPPFFGVPDDGTSDLGIDAVRLFDPMFSDAVANLPSNSLAALVSRVVPSSIMLTRVPSNGPVST  
TIYGKRTFLSNRRRARLRDIPMLITTTLVHQRRFTTPPSFTLFGSEAVPVTTLVAAGYNYFIAEQTRNPNL  
AHLDDLGTGPECRILSLIPPTLQITMSDARPCAELMASFDPALTDYIQGDYSIAAFWNGVRCDSVTAIFT  
IGAAAAATGMDLIAFLQQLIPRIVAAGGTRMWLQLNTPLYGATSLPDLIDIDTRDHVYRFNGGERVEP  
YTDPIPLQQAIAALLPAAALSWHLSPTCDWLSYIIGVGSPINLSIDITAVAYSRLTPILHIDTTTTPPLRVN  
PVPTPLNQCAIRITSLDPAAVLSVQHNGVEVIGGTPGNVTVAGAAVLQYVPAAQEFLLQFTPTPLPGI  
FDVFLTTLGQPPVPRGSFTISPPPTVTINAPAPGQLDFTDNGNDAQINCDMYQLAVCVFKDGQYTR  
VNPEKASVVTNGANRDLHFVLDLSDNHVLLYLCDVTPSSLGDRIFPLVDIYRVAFPNNTPVRASLPY  
TGGAHITQGGNPYLSLTPPAVLPAAGVALAALSTSVATQYPTYTLPPGAYVYVIE

>S2

MEELFNALPQPLQQLSLALAGEIPLTDHIFEQASSTWHVQPRSLTYKLLDHIQFSTPVVVPSSIYNSVD  
WSKCTINQDRVERVPTIDDPDDVYVPNSDIGPLLSPLHTIPDYGFLHPTIENDATTLRAERARCASTFY  
KIASQARQVKLDPIRMLGFLLLVQCRRRVPSGLVTDQPSSRSAGSSPSLHAIWQIMQYYKVQGTYYP  
ALVVPSGAIWWIPPPGKRNIVSVQYLLTDLINLAILAHMTDMSPQLELAGVLMYLAASSHSYAYTLL  
QMKGVFPALSLRSMYRNKGFGGKAPAIEWTEPRSKYKFKWTGVTHLHDGLRPRSPAMDDATIATLSK  
YELVDIGHMVINIRNQHPQHNDHSDVRFRVDTMALTSGLMYLVRQPTMSVLREYSQVPDIKEPIPPSAWT  
GPIGNVRYLLPSVQGPARGHLYDTWRAAARQIAQDPQWHDPLNQAIMRAQYVTARGGSSASLKFAK  
VTGIVLPEYDDSKVKSSKIYQAAQIARIAFMLLIAAIIHAETVMGIRNQVQRRARSIMPLNVIQQAISAP  
HTLVANYINKHMNLSTTSGSVVTDKVIPLILYASTPPSTVVNVDIKACDASITYNYFLSVICGAMHEGFE  
VGNADAAFMGVPSTIVSDRRSPVAPYSRPSGLQTMVQHLADLYAAGFRYSVSDAFSSGNKFSFPTSTF  
PSGSTATSTEHTANNSTMMEYFLTVHAPSHVTSPLKRILSDMTIQRNYVCQGDDGILLPHEAASKVS  
AEDMTELLDCLSQYGQLFGWKYDIDWSDTAEYLKLYALMGCRIPNTSRHPPVGKEYAAPQTDEIWPS  
LIDIVIGHHLNGVTDVLNWREWLRFSWAFACYSSRGGYTNPGRGQSFSAQYPWWTFVYLGIPPILLPGQ  
TPFIHSCYMPPGDQGMFSLNGWRDWLIAHASSTLPLRHPHPVWGLANVPSALTQFGVYAGYHAA  
QHYYRPPKAPETASSDSISQITSDLTEYLFYDSALKARVMKGRYNWDRISTSLSLNVGSRVPSLFDVPGK  
WVAAGRDAEKPPPSVEEMFTSLNRCIRRAQAFSRILLELYLRVHVALGESIPLAIDPDVPQVAGADPA  
NDDHWFKYTCLGDIPSATRNYPGESLFVGRVVSGLDVEAVDATLLRLKILGAPPEAFI AVLNGIGMSDS  
EAHQIAGRISLANAQLVQIARVVHLSIPSSWMTLNTGPYIHHHAYDFKPGLTQPSAKSRDKSVWMSPI  
LKLCTSYAMTVAGPVRTSIVTEIDGSAAALSGNLRVWMRDV

>S3

MPRRSARKAQSATNTSADTNVVPATDAPTSNSPPTTISPTQAAADANQQHAGISTSQSGPNAVGD  
SA PSTSVNNDGDIITRPTSDSIASVANATKPAAVVSDQQAMKVTPIVNPSSYVCNVCNARFSTMSALSEHL  
RSDHRDDASTLLATPMINNAIRSFLTAWDGLRILAPDISSKALSAYLDSAVANGPELIIEDTGLCTSFMLL  
DNIPSAHLTEELIGFTWFMQMYQMTPLPEGAVNRIVCMTN WASLGDEGRGLEVRLLPPTDSSVHAY  
KTVLSRGYIDNVQFNPLALRSNVLLMLLQFTLSNLKINKSSTFTSDVTTLTSGRMIRAFEGRTPELLALAY  
PGRAVLPTQTKNAQFLSTAIPDRIGRLDRANLIGGEVSAMVECMELCDALTNIRETYVMLLRSMHQD  
PTQIVQIVNECANNLLNSTIPISLRPTILCPWFASSEDRLRLQQVMHLVNISSNTAAALPLVEALSTLLRSV  
TPLVLDPTVLNTNAITTISESTQTISPISILRLQLPMGNDYAAFWKCIASWAYNGLVTTVLSEEAFPDSSQ

SITHLPSMWKCLFLTLAGPMTSDPHSPVKVFMALANLLAQPEPIAIGVPGMHQTTTPASQFSHPGVWP  
PGFLNPQLINPQQAPLLRAFAEHIRANWQPSEFGYGSTLQGSANLFIPPNNRMVYPWPNQPLPRLTVA  
PTYDSAMSNWISTTVAFFIRVNSVNMATVNDLRRMTGVMAMRQVKMTMPFYIQHMCPTELSV  
LASVTVTPPFQVPFTRLVQNDVITNVLVARVDPAQRGDAAVDIRATHATFAAALPVDPASIVVAMLCG  
QTETNLIPSHHYGKAFAPLFASNAMFTRNQRAVITREAFVCARSAVAQCQDAGFLVPRPLDALRQFDV  
TSAAAAEIMHAVNDAFKTAFDLGALLDGLALYGDPRADLSAAYLQYGGNVVREHVPPGTSHIHR  
ALQQVESTFMAEMNLFNVARGDLYLVQTATNGNWSMPAPVAAPPFVRGGPNVRVVGFRGTIVPRPN  
GLEPQLIDDANVPQDIAGDWVYPSDVLQVSVAVFRDYVWPMVKAGRTRVLIELGHYVYTLHYDPOI  
SLDEAPILEEWLTHINPAGIPVPFCIPTQVYPCITARRVHYAFTSENNNDSLFSTNAASIDTAFGENAA  
VSPLRWPGLVDPNYRVGTNDLPNRITLYNSLYRYNFTYPTLDGIMYVRSAT

>S4

MARRITLNSLKPLSAMNSHPSLTPTTTTPATASTSAAPSNDSPATASLPAAFNQLVFEFNGVKYTGSPH  
SWMMPYRGFEKHMVNMLVDTRPDATFSRFDDLLSAIVSALAVNGVTATTPFNEGELILLRFACKTLR  
ASAAAPTSPISDWS DSTPGLLDSL DYGLPLSPSCEAAPVLEPLRHSPLPPLHPDPAVSHSLVPM DVPD  
SVLVPPSPTPATGAVIPSLSLTLSTPPRSRASTASSSTPAVPRLSAAATPRRPTHIADETYNRSRAAYA  
MGVPALSPMYCTGKERHFEQTFYSAYPHAANGVWTAYQHSIILIAPTEDISLLTLHHVEREQSATEAY  
HLRALDGTNVARVAVCRLDPSMTCRDVHAMMAGHNVSISGLAAAFMIRHRLTDGVFSKAFRRIVM  
GIDPVMRHPDVPPLHLFAILTDHRLDHAATHAVMSMRIALMQVESASYQATKTWLRGHLPTIFASA  
TTDSSSDSIHATILEADKGMRTADTPGSSNLREASNAALQRQVIDMDVQVNALLRTISDLKSYTNH  
QQASQGQTIQQYLHSHVCVNTKELAVLQSVMEHAANAIQAVRVHANDTAKAALSEKVSVP LTAQL  
SDTLAHLHAARSRNDELVAQLTIAESEAMAAAAERDQACELASELQTQVAAMQOEYENVTRALMQ  
DNEQLQHSAAATAEAAATSTFRPTPLVYGTAPSALPAVGPGLTIPLLAPEIDPASFL

>S5

MITIVIPTAHFSWTD TNFLNSVDYRLTTQPKTRDRFAVYAPGWLRRQLDEFSASLTASELLQALESIP  
VKARCLLLPKPKRFAQWLLDVPAANLWHIPVTTLRATVASKHPSSDIFNFIADHVPPNAEFDTITRRVP  
AGKDIYVRTTKVIGAPLCLAAPAKYYAGYLSSHQLDSIYPDGWSPETFRKREYCLTILPSLLGPRTFLLD  
VDAERDTTYPLSVLWPQLRAAALKSRLLLPPVALLRRVVDPSLKPIWSADTDPAFRALRLSRPSTASRP  
AGDFDSALPIADLCLFESEPD SHGR TAPGTRLTLHAVPTDLLTALS IQENVRYPLRQQSGMFVHVLL  
ALLMSDDVSVTGTRRSIKMETAHASAKPFVHITIERCVSARLIDVRGSTAMYANAVCLTLPKGSYKSTII  
DTLPAMFPDLPILDSNAVIDSDALGDSL RPSFELQFLERLNVLDAGVIDRAVASILNPTS DTSDDAAAM  
VLETFNSLYRDVMTPAQRTRLPFLTQQGRVLAFAHSDYELLAANIPIQVIRGAIPDHVNNLLARRNRV  
GGTALQVLLDYCYRTQASPLATQPAGRLYKQLFGPWLMVPRLDTPLITLRLTATAPAKVLRAAGWTV  
DGDPPLSVSCLRAYVTDRESAASLIEARLDSRALVTIDGDQIMFVEYAPPLPLVSIPRTFLLPVTYVAHW  
VEPERVLLHGGNVSFTSGLEWTFADDPQGVTPAGV

>S6

MGNVQTSVNTYNINGDGNSFAPTS DMTSTAAPAI DLKPGVLNPTGKLWRPVGTTVATVDSLAI VSDRF  
GQYSFVNENMRD TFAKALFDINMWQPLFQATKTGCGPIVLSAFTSTTSGYVGATAGDALDNFVTNGT  
FISSVQILNLQRTIAARMRDVAHWQKHLDTAMTMLTPDISAGTASCNWKSLLAFAKDILPLDNCLTY  
PNEFYNVAVSRYPALRPGNVETKL PDAQSHPLGEVAGAFNAATSEVGSLVGSSTLSQAISTMAGKDL  
DLIEADTLPVSVFTP SLAPRSYRPAFIKPEDAKWIAEFNNPAVIRQTL SYAGDDYTIQLGPGPTRVIDM  
NSMIDAVLTL DVS GTPLPFQTNADLSSAIPAFVLIQTSVPIQQVTSASNITAVTVISAAEASAINLSVNR  
GDPRFNMLHLQATFERETIAGIPYIYGLGTFLIASITTSSDFCNPTLMDGLLTVTPVLLRETTYKGEVVDA  
IVPATVMANQTSEEVASALANDAIVLVSNHLTKLANVVGDAIPVASKTDDSATS AIVSRLAVQHKL SQ  
VGRTNPTPPDYPLLWRRRAKRAASMFVSNPALALQVGIPVLTQSGMLSALTSGVGTALRTGSLGKGV

DASEKLRARQSLTVAKQTFDQIGSLWPGK

>S7

MNTNRS�IDERYDWIVAYERHIEPEAITAIRTPAYGALPPTQIPKFLGPNPKYFVYDGNVEEVEGQLIKD  
PSDDYQPRRYADTWTCSLFTEVPPSHPSWPRDTPVQYDSTWSPYHHVPMRYFPRFMGLEDDLIKPNĐ  
GFWPILHRCAGFRFRYPWRFDLDALAAGIGTTVDNIRCIÆSGAFATVVGTŁRAMGWKYHHLSGLRP  
QHVEYCVSAWALSFTREQLDDYKPGAWFDDLLRVPIYPDEQPIGLNREQLFTHPFVLLSWIRIQLLGGG  
G

MPCQDTVSLSIQHTSVYVQHSCCVSTTTASATSATALGLGCIACGIIGVIVVASGLCCLVNGRCSYCRGL  
ALRSSWKSPTTSLRTHQPISFGLRHLIGTDLRRPTHRSLELLSDIHPVVPNRECPPPYSŁTVEPEVHTP  
QTLQPQPRŁQPPRW

>S8

MAQRQFFGLTYNFYQGPAPLYDLNDLQEIAGCYARPWTSRFSHLAISTGSLPVWSARYPSVAARNIIIN  
TILGAHLNPFSGGQITSHQGITWRDPVLSSLPVPAVQPPPAWAVAENVALDSNNYPTYVLNHSAMW  
PVNQDVHVMŦMWALSDQGPIYRLEVPAAPMPAATTAALMAYIGVPLAHLAQŦAYKFAGQLPQSPDS  
ŦMVSTIRWLSAIWFGSLTGRLNRSRTCNGFYFEFAKPSLNPDQAILKWNDGARVAAPAAAQVSYMRCI  
SPHWQHŦITEVAGAIMSQSVŦAVTGLATLIDEATŁPAWSQGVANLTGNGAGVŦPCLDYNPVPMAAA  
RHLQWRQDGLITAAQEAQMNADYŦAYALTIEQHŁTAMŁAANPVAGGRMPIQPFVAADFQAGQŦA  
AAVALAQAMFV

>S9

MAHTGTATŁINAERTDRTLRLLETFPSŁTITVRQDTSGRDLISSTYSATGMSAAARNŁNPIANVKNMŦRQ  
PGYVKPAHTPTNTVPLRVATSTGLEŁPTAHLAQMPVDQALRDVAAAVPŦHAAHVLPQVDRVŦPLŦ  
ŁAARVAMVCAGŁDCDDIHEIPPVPTAMALAFTTKVLLIHVVVDGDRASIAVNPDPARALLHADRLGN  
IITNYGYDVŦRGTVRRDAAAALAPSELPAAYPIEWŁGLICGLIATQIELDŁDMLAMNQŦEQKLVAŦHVQ  
AVDPFİNRLQSYATŁSARİMHLCVŦHSQRPFŦRDFPELLRHWQKPEŁTŦAIPİNİTŁRGAALVSGNGAEL  
FRVRALPIGGM

>S10

MPLHMIPQVAHAMVRAATTGRLŦMYŦQŦRTETŦNYDHADYİTCGRYŦVCAYCLŦŦIAPHANVQŦŁPS  
DHFCPRKPNEIAATŁIEVSDKŦRAALARSŦIDYHTŁAVQAGFVEPTDDDDSSİSGDİTELŦFRŦCDŁDV  
ASASACVRSHCQAGHDGIHSLPİMTGDFKLPNERVHRAWGTGQSQNKVŁTRCPTTGLŁLAHDTQLR  
ATSVVATAATRVLŦMHSLŁTSANASDGŦQŦRAACYGPSFSNŁPYACHSACSADMAHFDCGYİVGLDL  
HVEPSD

>S11

MATAGVŦNAIDGLİLSRLDEAITNŦPTİŁRLRKVSSLWKAYDNHVADPTAHELLŦMPADŁAELPPPLP  
PŦAELNCSYŦATAPŦPPPAVDŦŁWGTASYEİİGREŦRLASSEKAPRIİHVŦDEŦIRLEVPTMAFTŁPSAL  
ATGSLRVŦŁPKGAIHSALTGKFDERCWİRLŦATŁTKWMSPTVŦVŦSDWŦLETPTGLİKPPVŦTGFNARA  
ŁŁRDSSVLWFPAPŦŦSMİARRAİVSPMSCVFE
